# Supplementary material for: Multimodal Deep Learning for Rice Yield Prediction Using UAV-Based Multispectral Imagery and Weather Data
Source: MDPI journal article supplement (doi:10.3390/rs15102511), 2023-05-10
Supplement: s1 [file s1]

**Table S1.** Weekly and monthly summation of mean air temperature, solar radiation, and total precipitation for four weeks after heading stage at the study sites.

| Environ<br>ment | Location          | Year |                                                          | Weekly Summation |        |        |        | Monthly<br>Summation |
|-----------------|-------------------|------|----------------------------------------------------------|------------------|--------|--------|--------|----------------------|
|                 |                   |      |                                                          | 1                | 2      | 3      | 4      | 1                    |
| A               | Sendai,<br>Miyagi | 2017 | Temperature (°C)                                         | 162.2            | 149.7  | 155.2  | 176.2  | 643.3                |
|                 |                   |      | Precipitation (mm)                                       | 47.6             | 51.7   | 36.9   | 30.3   | 166.5                |
|                 |                   |      | Solar radiation (MJ<br>m <sup>-2</sup> d <sup>-1</sup> ) | 63175            | 46698  | 43872  | 112051 | 265796               |
| B               | Sendai,<br>Miyagi | 2018 | Temperature (°C)                                         | 168.8            | 181.9  | 164.2  | 171.9  | 686.8                |
|                 |                   |      | Precipitation (mm)                                       | 89.9             | 23.9   | 25.7   | 94.7   | 234.2                |
|                 |                   |      | Solar radiation (MJ<br>m <sup>-2</sup> d <sup>-1</sup> ) | 94300            | 124262 | 144150 | 63185  | 425897               |
| C               | Sendai,<br>Miyagi | 2019 | Temperature (°C)                                         | 179.9            | 181.3  | 168.4  | 167    | 696.6                |
|                 |                   |      | Precipitation (mm)                                       | 4.5              | 27     | 39.3   | 26.8   | 97.6                 |
|                 |                   |      | Solar radiation (MJ<br>m <sup>-2</sup> d <sup>-1</sup> ) | 79046            | 98044  | 86156  | 85781  | 349027               |
| D               | Gero,<br>Gifu     | 2020 | Temperature (°C)                                         | 189.2            | 185.1  | 186.2  | 174.8  | 735.3                |
|                 |                   |      | Precipitation (mm)                                       | 2.6              | 24.2   | 40.5   | 80.7   | 148                  |
|                 |                   |      | Solar radiation (MJ<br>m <sup>-2</sup> d <sup>-1</sup> ) | 142735           | 153036 | 120843 | 94164  | 510778               |
| E               | Kaizu,<br>Gifu    | 2020 | Temperature (°C)                                         | 204.86           | 204.86 | 192.84 | 174.65 | 777.21               |
|                 |                   |      | Precipitation (mm)                                       | 2                | 50.21  | 98.82  | 109.13 | 260.16               |
|                 |                   |      | Solar radiation (MJ<br>m <sup>-2</sup> d <sup>-1</sup> ) | 166253           | 127854 | 93404  | 99915  | 487426               |
| F               | Kaizu,<br>Gifu    | 2020 | Temperature (°C)                                         | 203.36           | 204.03 | 193.16 | 174.12 | 774.67               |
|                 |                   |      | Precipitation (mm)                                       | 11.75            | 34.18  | 109.17 | 74.53  | 229.63               |
|                 |                   |      | Solar radiation (MJ<br>m <sup>-2</sup> d <sup>-1</sup> ) | 156893           | 122086 | 93380  | 96762  | 469121               |
| G               | Yoro,<br>Gifu     | 2020 | Temperature (°C)                                         | 204              | 204.7  | 193.35 | 174    | 776.05               |
|                 |                   |      | Precipitation (mm)                                       | 14.2             | 29.21  | 93.33  | 62.4   | 199.14               |
|                 |                   |      | Solar radiation (MJ<br>m <sup>-2</sup> d <sup>-1</sup> ) | 157906           | 122609 | 93771  | 97028  | 471314               |

|   |                   |      |                                                          |        |        |        |        |        |
|---|-------------------|------|----------------------------------------------------------|--------|--------|--------|--------|--------|
| H | Kaizu,<br>Gifu    | 2021 | Temperature (°C)                                         | 189.6  | 202.7  | 199.7  | 203.7  | 795.7  |
|   |                   |      | Precipitation (mm)                                       | 21     | 0.8    | 13.8   | 39.2   | 74.8   |
|   |                   |      | Solar radiation (MJ<br>m <sup>-2</sup> d <sup>-1</sup> ) | 154625 | 169318 | 141496 | 133564 | 599003 |
| I | Fukue,<br>Gifu    | 2021 | Temperature (°C)                                         | 172.2  | 177    | 201    | 168.3  | 718.5  |
|   |                   |      | Precipitation (mm)                                       | 223.2  | 79.9   | 0      | 87.2   | 390.3  |
|   |                   |      | Solar radiation (MJ<br>m <sup>-2</sup> d <sup>-1</sup> ) | 55696  | 73224  | 144013 | 82089  | 355022 |
| J | Fukue,<br>Gifu    | 2021 | Temperature (°C)                                         | 171.9  | 176.8  | 201.3  | 169.3  | 719.3  |
|   |                   |      | Precipitation (mm)                                       | 242.4  | 82.6   | 0      | 89.4   | 414.4  |
|   |                   |      | Solar radiation (MJ<br>m <sup>-2</sup> d <sup>-1</sup> ) | 55568  | 72927  | 141562 | 81451  | 351508 |
| K | Fukue,<br>Gifu    | 2021 | Temperature (°C)                                         | 170.5  | 176.6  | 199.9  | 168.4  | 715.4  |
|   |                   |      | Precipitation (mm)                                       | 277.1  | 58     | 0.9    | 63.3   | 399.3  |
|   |                   |      | Solar radiation (MJ<br>m <sup>-2</sup> d <sup>-1</sup> ) | 57145  | 70876  | 141539 | 83284  | 352844 |
| L | Kaizu,<br>Gifu    | 2022 | Temperature (°C)                                         | 201.4  | 186.7  | 187.6  | 188.1  | 763.8  |
|   |                   |      | Precipitation (mm)                                       | 10.8   | 106.7  | 30.3   | 94.2   | 242    |
|   |                   |      | Solar radiation (MJ<br>m <sup>-2</sup> d <sup>-1</sup> ) | 119518 | 107631 | 102373 | 113040 | 442562 |
| M | Kaizu,<br>Gifu    | 2022 | Temperature (°C)                                         | 201.4  | 186.7  | 187.6  | 193.7  | 769.4  |
|   |                   |      | Precipitation (mm)                                       | 10.8   | 106.7  | 30.3   | 92     | 239.8  |
|   |                   |      | Solar radiation (MJ<br>m <sup>-2</sup> d <sup>-1</sup> ) | 119518 | 107631 | 102373 | 166796 | 496318 |
| N | Nankoku,<br>Kochi | 2022 | Temperature (°C)                                         | 184    | 185.3  | 184.9  | 187.4  | 741.6  |
|   |                   |      | Precipitation (mm)                                       | 288.5  | 42.8   | 63.9   | 3.6    | 398.8  |
|   |                   |      | Solar radiation (MJ<br>m <sup>-2</sup> d <sup>-1</sup> ) | 106000 | 104769 | 109717 | 102190 | 422676 |
| O | Nankoku,<br>Kochi | 2022 | Temperature (°C)                                         | 199.2  | 200.2  | 200.3  | 198.9  | 798.6  |
|   |                   |      | Precipitation (mm)                                       | 131.1  | 61.7   | 4.6    | 1      | 198.4  |
|   |                   |      | Solar radiation (MJ<br>m <sup>-2</sup> d <sup>-1</sup> ) | 158620 | 159223 | 125380 | 131192 | 574415 |

**Table S2.** ANN model performance for predicting rice yields with the training, validation, and test dataset.

| Model No. | Architecture | Weather | Layer | Train                      |            |                | Validation                 |            |                | Test                       |            |                |
|-----------|--------------|---------|-------|----------------------------|------------|----------------|----------------------------|------------|----------------|----------------------------|------------|----------------|
|           |              |         |       | RMSE<br>t ha <sup>-1</sup> | RMSPE<br>% | R <sup>2</sup> | RMSE<br>t ha <sup>-1</sup> | RMSPE<br>% | R <sup>2</sup> | RMSE<br>t ha <sup>-1</sup> | RMSPE<br>% | R <sup>2</sup> |
| 19        | ANN          | No      | 0     | 1.366                      | 22         | 0.11           | 1.378                      | 24         | 0.12           | 1.392                      | 23         | 0.06           |
| 20        | ANN          | No      | 1     | 1.212                      | 19         | 0.30           | 1.214                      | 20         | 0.31           | 1.226                      | 20         | 0.28           |
| 21        | ANN          | No      | 2     | 1.135                      | 18         | 0.39           | 1.131                      | 18         | 0.40           | 1.160                      | 18         | 0.35           |
| 22        | ANN          | Monthly | 0     | 16.366                     | 243        | -155.39        | 15.941                     | 240        | -132.88        | 16.955                     | 255        | -156.14        |
| 23        | ANN          | Monthly | 1     | 0.946                      | 16         | 0.58           | 0.927                      | 16         | 0.60           | 0.947                      | 16         | 0.57           |
| 24        | ANN          | Monthly | 2     | 0.946                      | 16         | 0.58           | 0.925                      | 16         | 0.60           | 0.953                      | 16         | 0.56           |
| 25        | ANN          | Weekly  | 0     | 1.115                      | 18         | 0.41           | 1.118                      | 19         | 0.42           | 1.129                      | 19         | 0.39           |
| 26        | ANN          | Weekly  | 1     | 0.964                      | 16         | 0.56           | 0.942                      | 16         | 0.59           | 0.969                      | 16         | 0.55           |
| 27        | ANN          | Weekly  | 2     | 0.946                      | 16         | 0.58           | 0.924                      | 16         | 0.60           | 0.952                      | 16         | 0.57           |

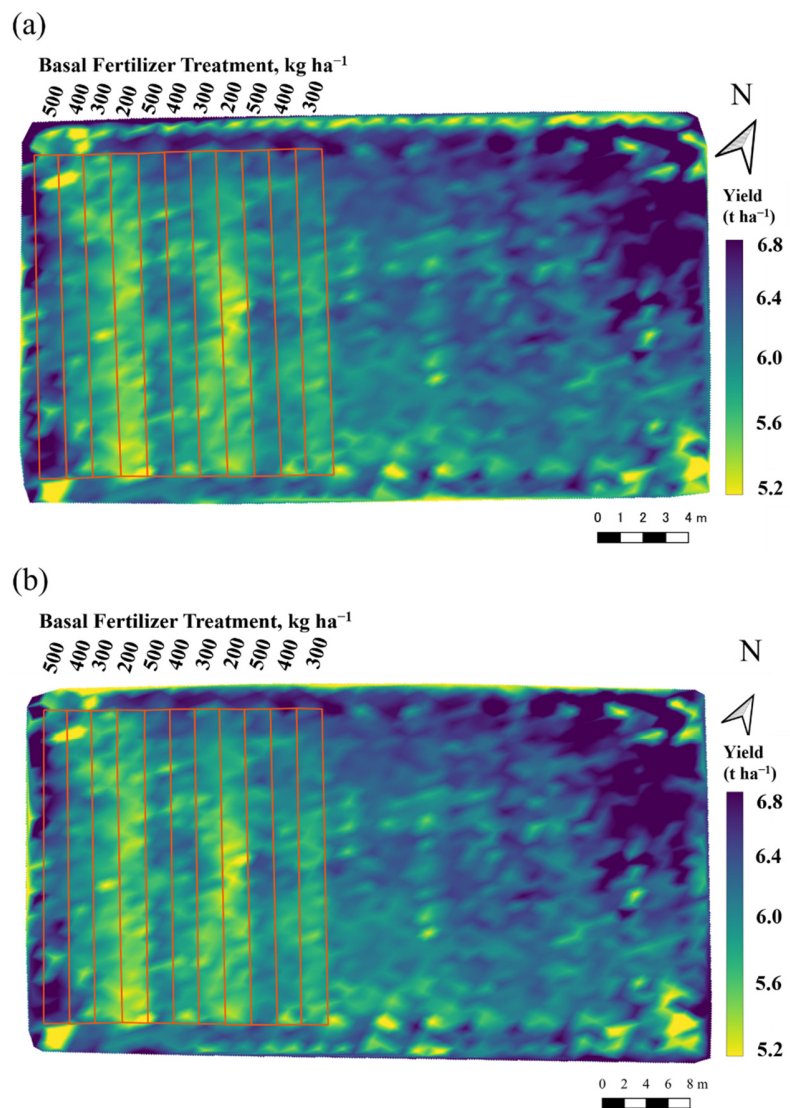

**Figure S1.** Yield prediction maps (using only UAV images) of a surveyed field based on (a) Model 1 and (b) Model 12.
